# Supplementary material for: Rational design of multi-shelled CoO/Co9S8 hollow microspheres for high-performance hybrid supercapacitors
Source: Royal Society of Chemistry journal article supplement (doi:10.1039/c7ta06036j), 2017-01-01
Supplement: c7ta06036j1.pdf [file c7ta06036j1.pdf]

**Electronic Supplementary Information**

**Rational design of multi-shelled CoO/Co<sub>9</sub>S<sub>8</sub> hollow microspheres  
for high-performance hybrid supercapacitors**

Yaping Wang,<sup>a,b</sup> Ting Zhu,<sup>\*a</sup> Yifang Zhang,<sup>a</sup> Xiangzhong Kong,<sup>a</sup> Shuquan Liang,<sup>a</sup>

Guozhong Cao<sup>c</sup> and Anqiang Pan,<sup>\*a</sup>

<sup>a</sup> School of Materials science and Engineering, Central South University, Changsha,  
410083, Hunan, China

<sup>b</sup> Light Alloy Research Institute, Central South University, Changsha, 410083, Hunan,  
China

<sup>c</sup> Department of Materials Science and Engineering, University of Washington,  
Seattle, WA, 98195, USA.

\* Corresponding authors: pananqiang@csu.edu.cn; Zhut0002@csu.edu.cn

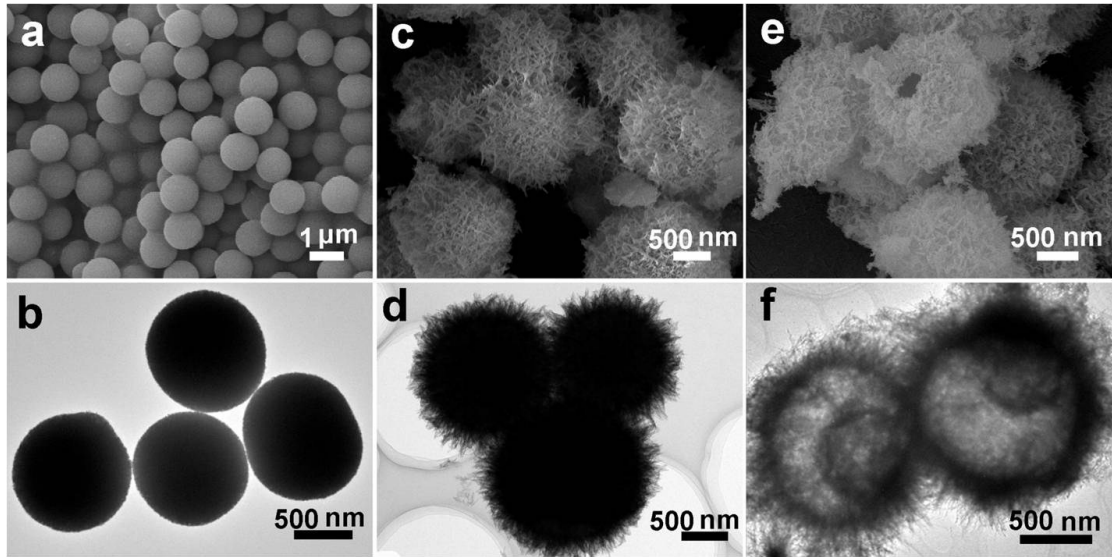

**Fig. S1.** SEM images(a-e) and TEM (b-f) images of the carbon spheres (a and b), the core-shelled CS@Co<sub>2</sub>CO<sub>3</sub>(OH)<sub>2</sub> (c and d) and the multi-shelled Co<sub>3</sub>O<sub>4</sub> hollow spheres (e and f), respectively .

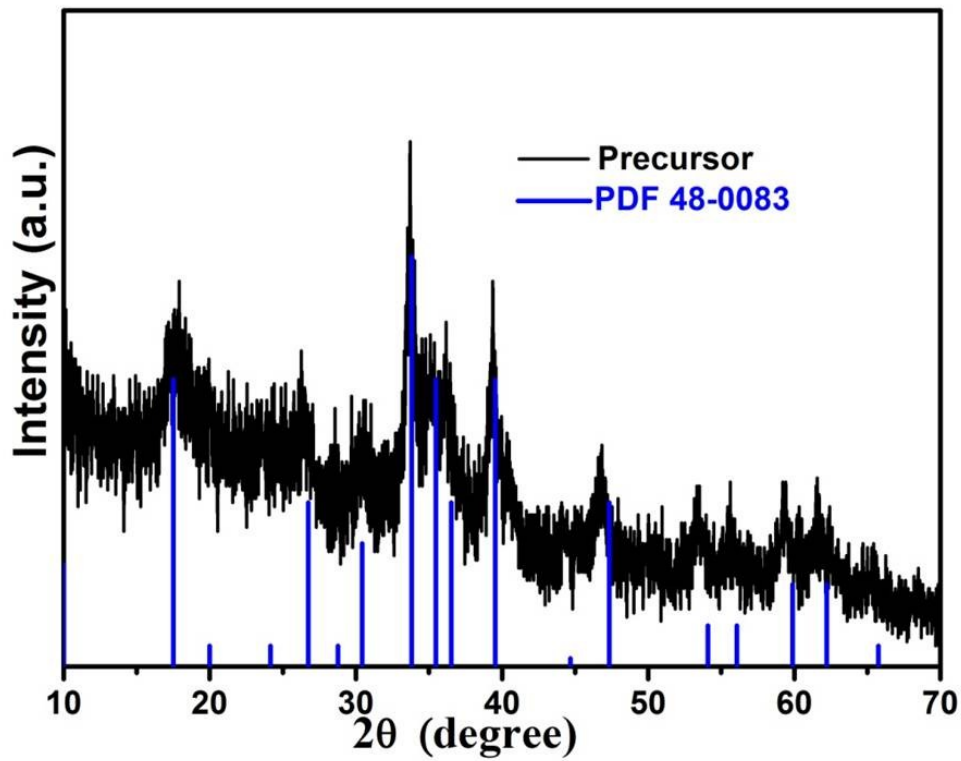

**Fig. S2.** The XRD patterns of the CS@Co<sub>2</sub>CO<sub>3</sub>(OH)<sub>2</sub> precursor.

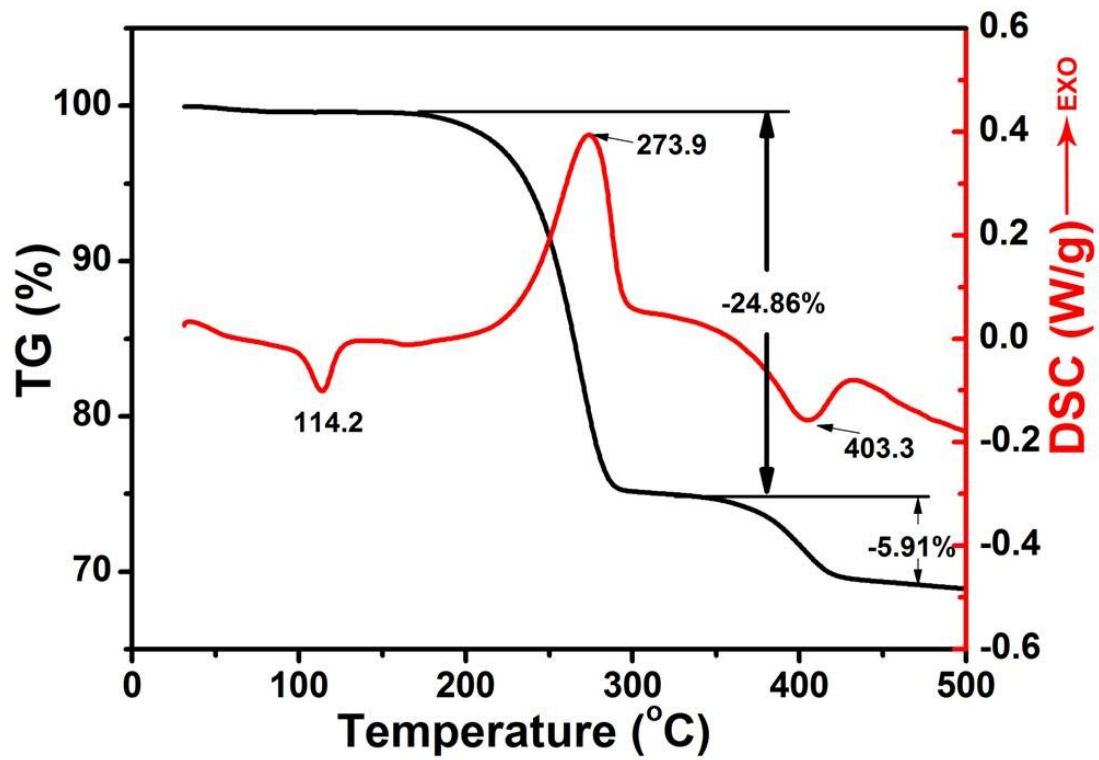

Fig. S3. TG and DSC curves of the mixture of  $\text{Co}_3\text{O}_4$  and S powder.

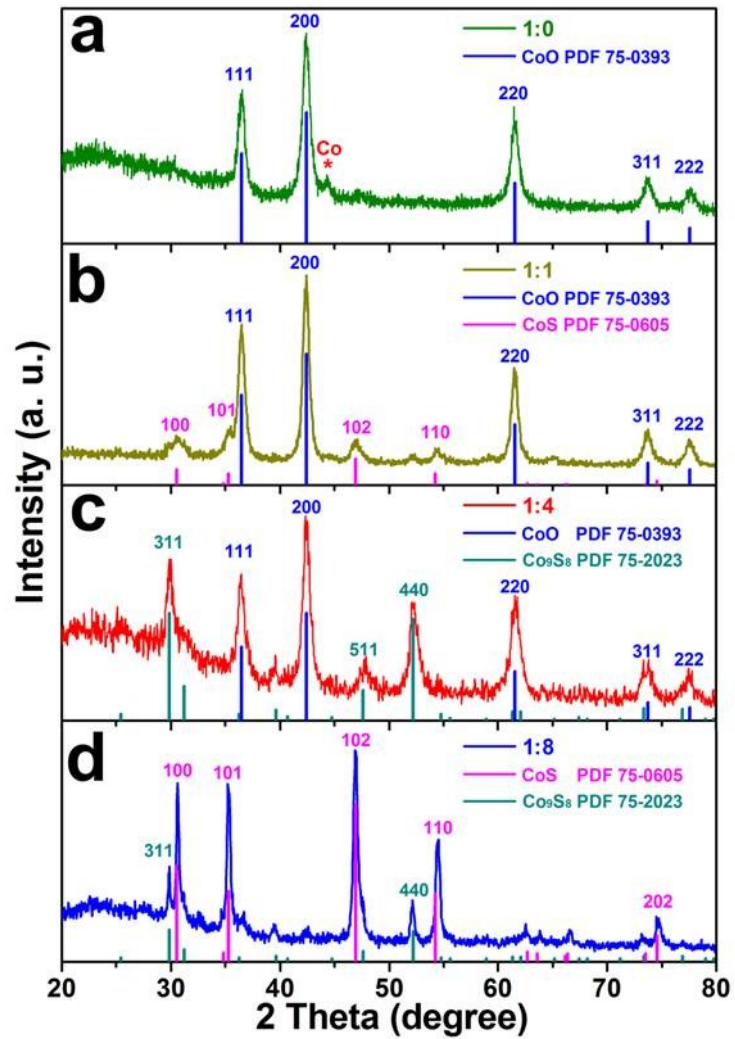

**Fig. S4.** XRD patterns of the multi-shelled cobalt oxides/sulfides composite hollow spheres.

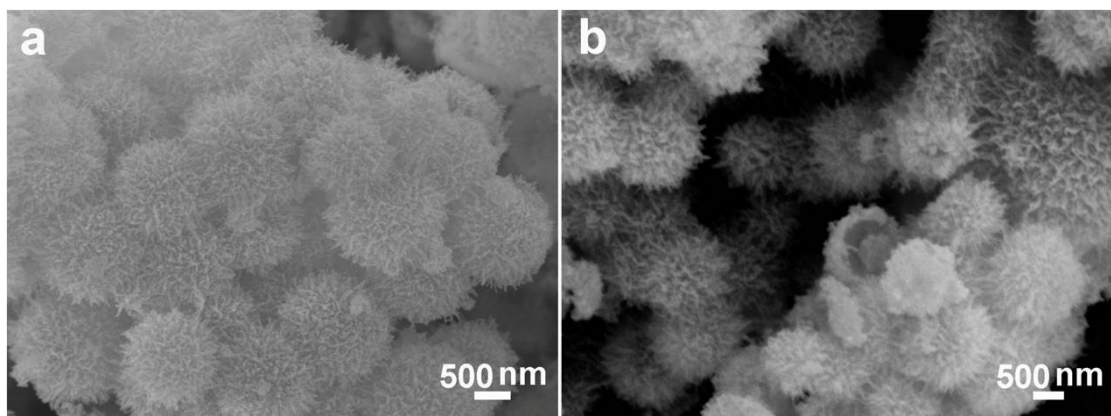

**Fig. S5.** SEM images of the multi-shelled CoO/CoS (a) and the CoS/Co<sub>9</sub>S<sub>8</sub> (b) hollow spheres.

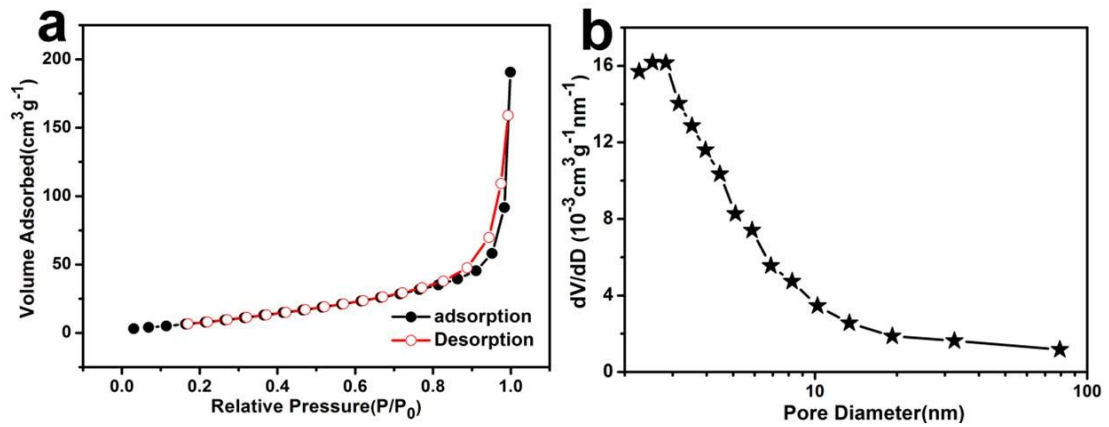

**Fig. S6.** Nitrogen adsorption-desorption isotherms (a) and pore size distribution (b) of the multi-shelled CoO /Co<sub>9</sub>S<sub>8</sub> composite hollow spheres.

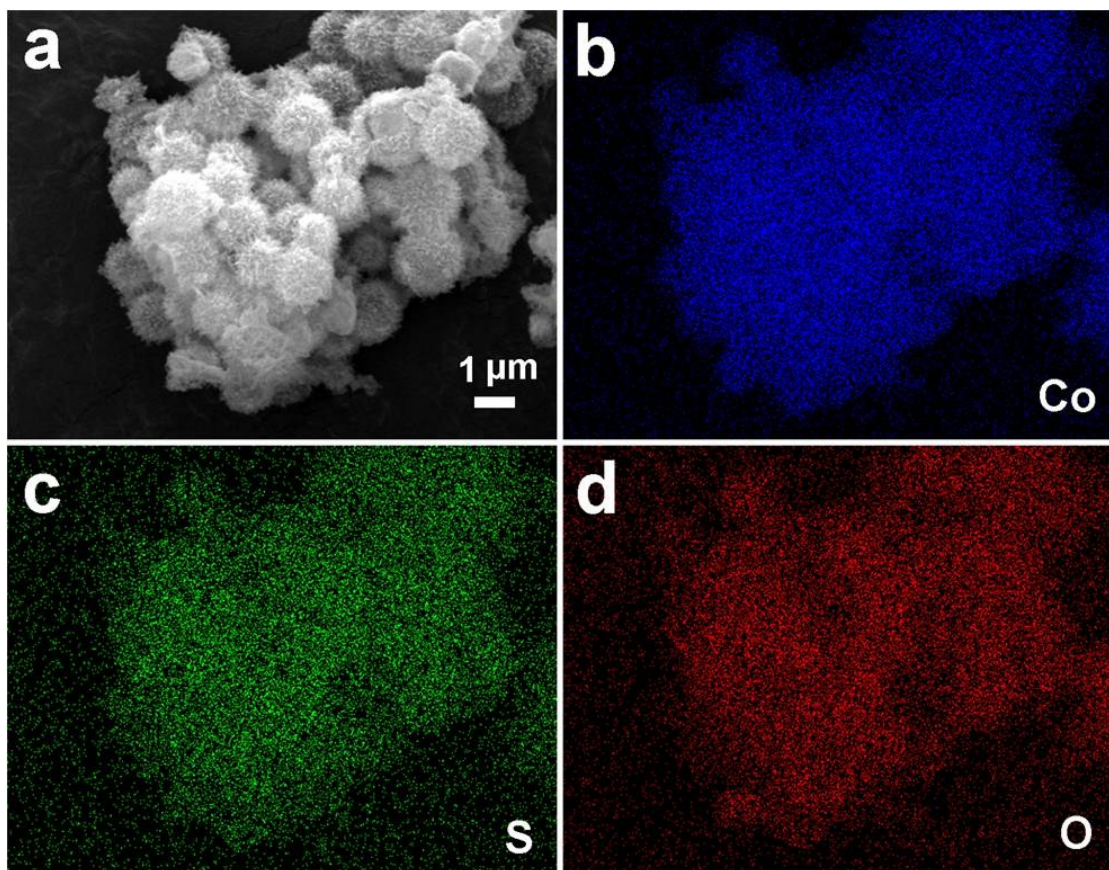

**Fig. S7.** The elemental mapping results from SEM of CoO / Co<sub>9</sub>S<sub>8</sub> microspheres.

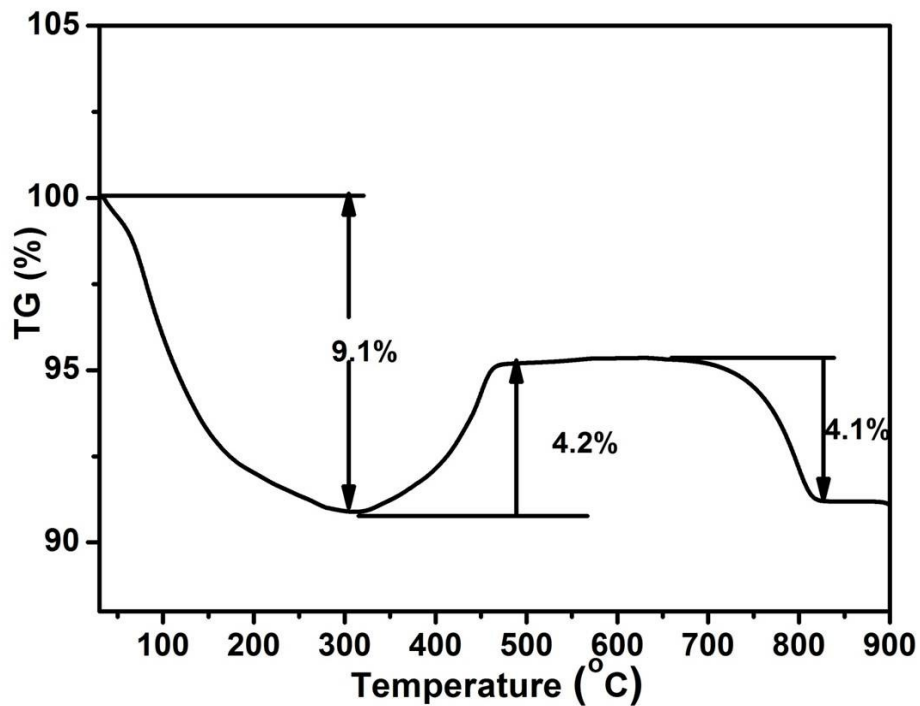

Fig. S8. TG curves of the CoO/ Co<sub>9</sub>S<sub>8</sub> powders measured in air with a ramp rate of 10 °C min<sup>-1</sup>.

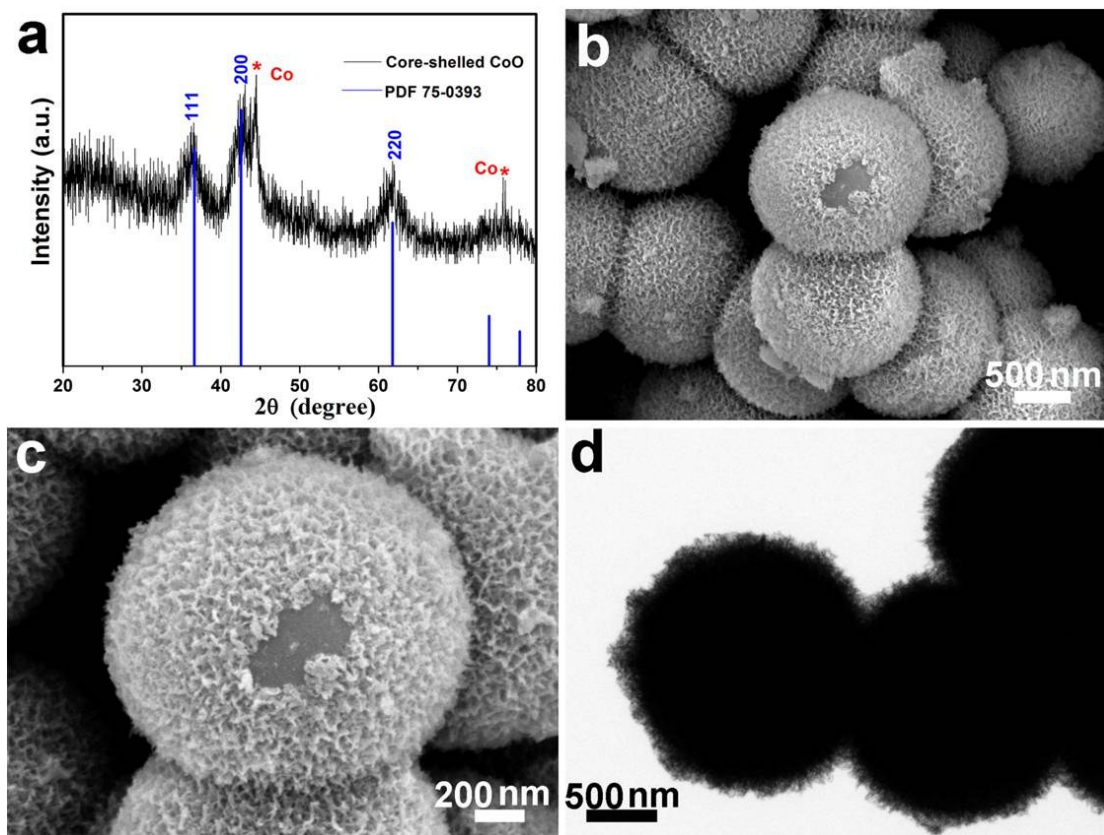

Fig. S9. XRD pattern (a), SEM images (b and c) and TEM image (d) of the core-shelled CS@CoO microspheres.

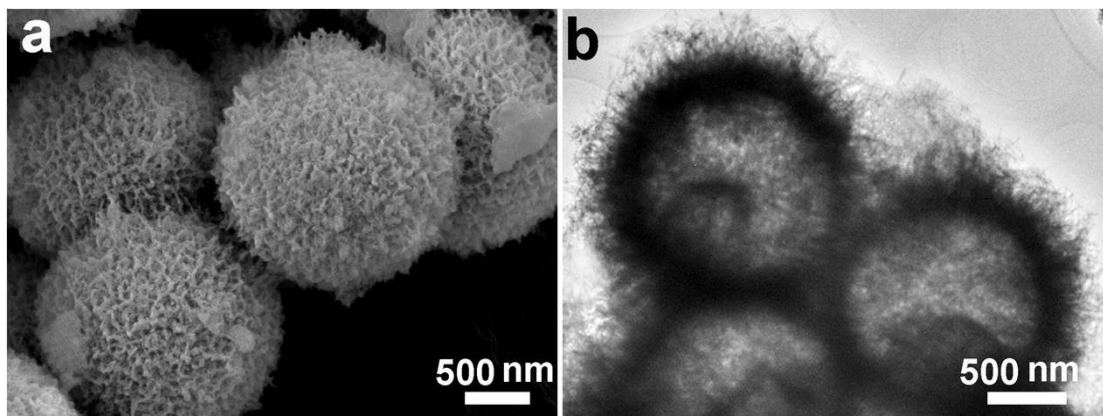

Fig. S10. SEM image (a) and TEM image (b) of the multi-shelled CoO hollow spheres.

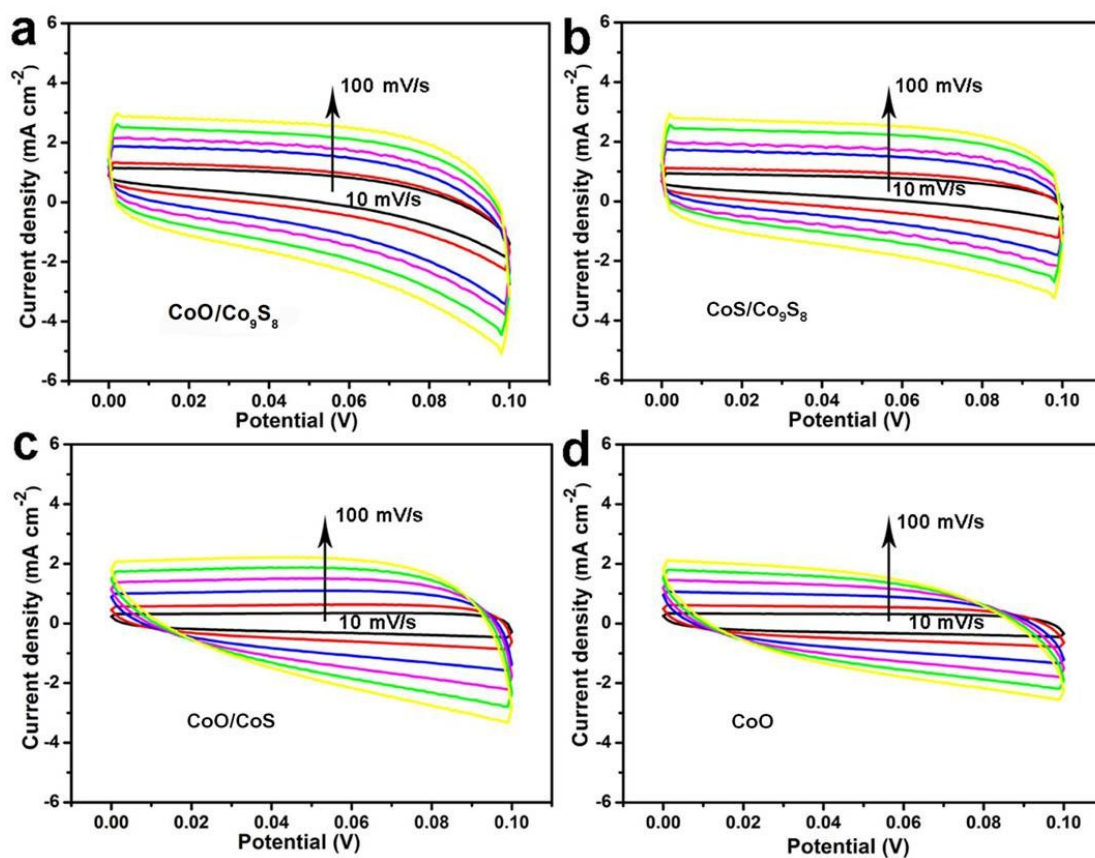

Fig. S11. CV curves of multi-shelled cobalt oxides/sulfides hollow microspheres within a non-Faradaic potential window (vs. SCE) at different scan rates. (a) CoO/Co<sub>9</sub>S<sub>8</sub>, (b) CoS/Co<sub>9</sub>S<sub>8</sub>, (c) CoO/CoS, (d) CoO.

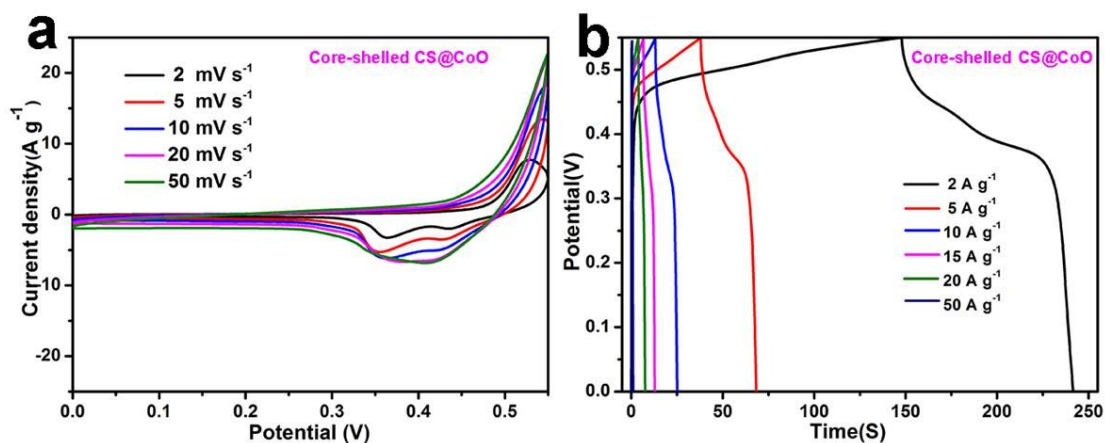

**Fig. S12.** CV curves performed at different scan rates (a) and GCCD curves at different current densities (b) of the CS@CoO microspheres.

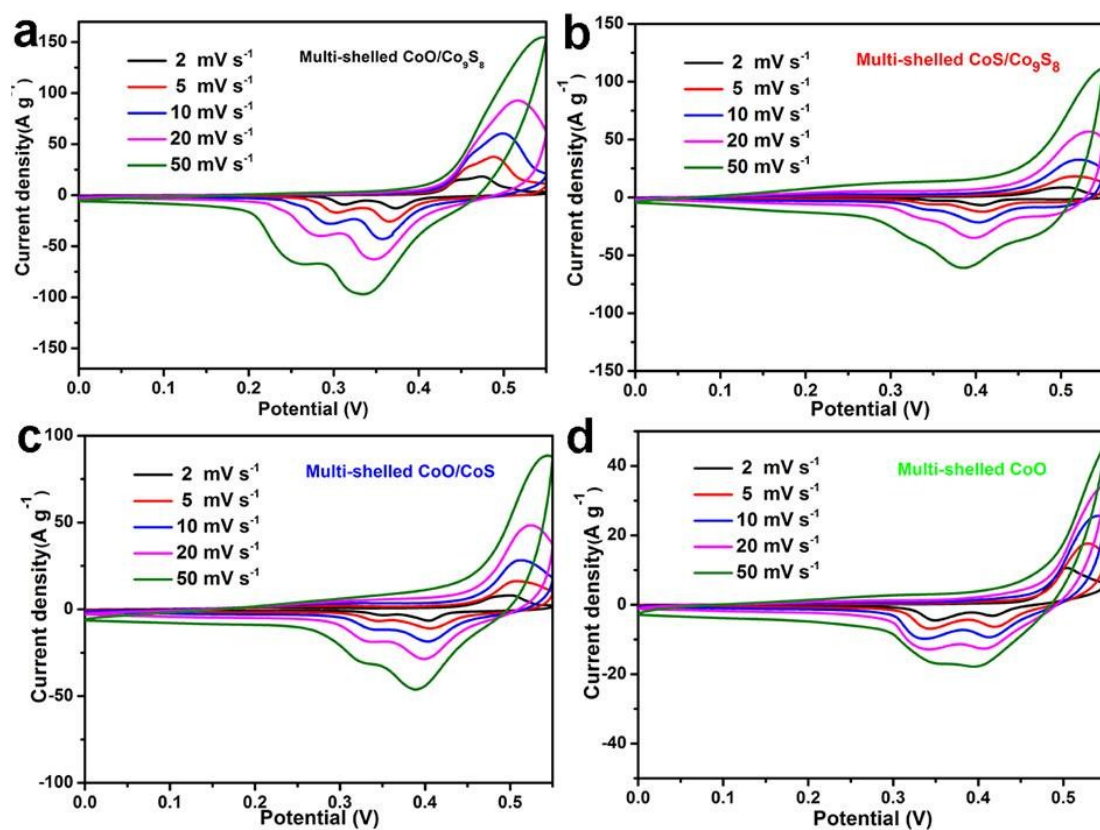

**Fig. S13.** CV curves performed at different scan rates of the multi-shelled cobalt oxides/sulfides composite hollow microspheres. (a) Co<sub>9</sub>S<sub>8</sub>/CoO, (b) CoS/Co<sub>9</sub>S<sub>8</sub>, (c) CoO/CoS, (d) CoO.



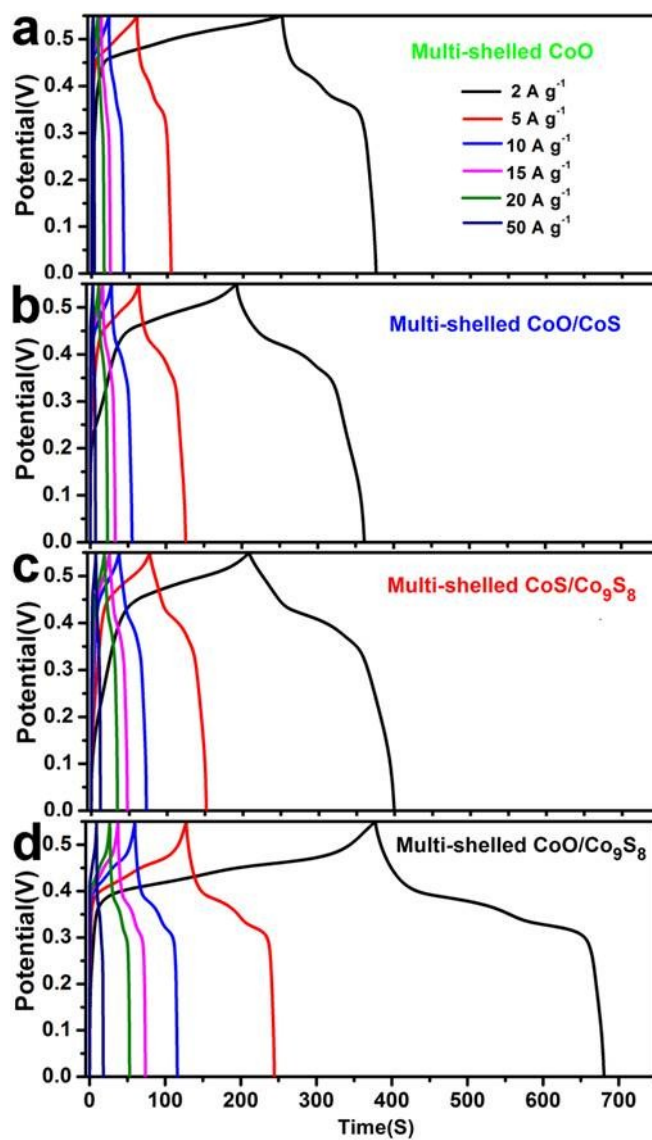

**Fig. S14.** GCCD curves performed at different current densities of the multi-shelled cobalt oxides/sulfides composite hollow microspheres. (a) CoO, (b) CoO/CoS, (c) CoS/Co<sub>9</sub>S<sub>8</sub>, (d) CoO/ Co<sub>9</sub>S<sub>8</sub>.

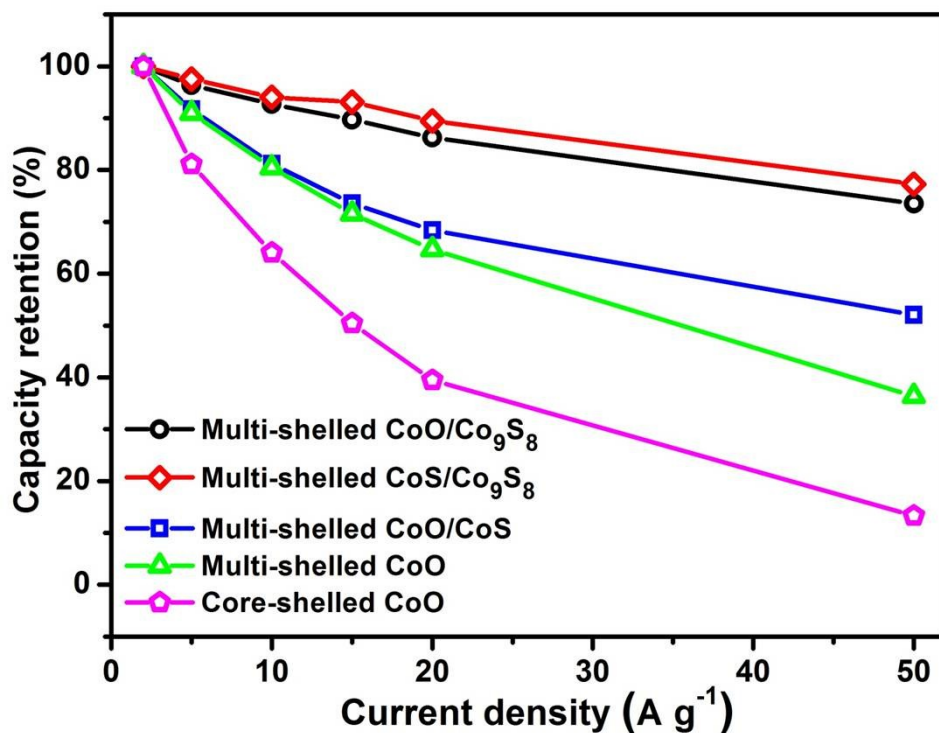

Fig. S15. The capacity retention at different current densities of the four multi-shelled cobalt oxides/sulfides composite hollow microspheres and CS@CoO microspheres.

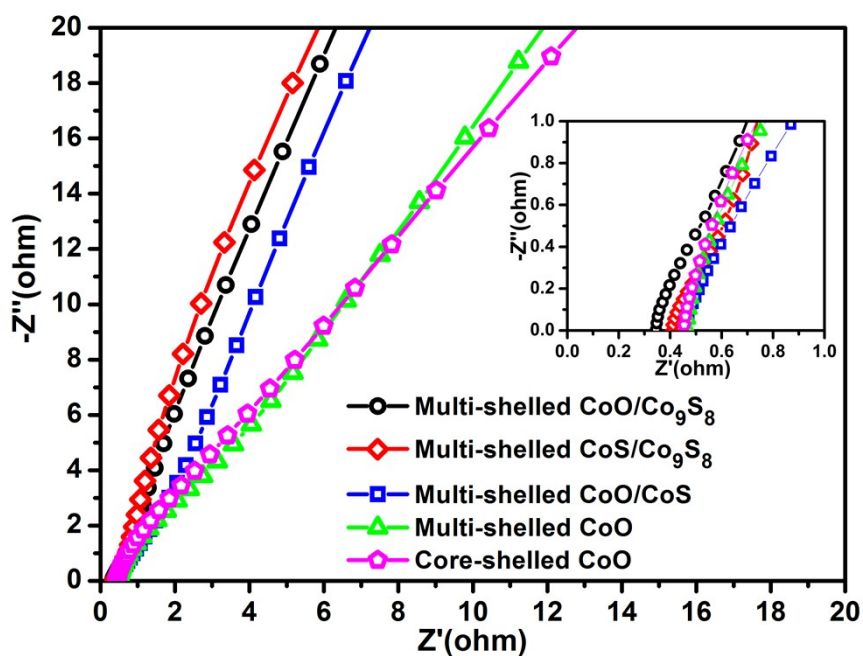

Fig. S16. Nyquist plots of the electrochemical impedance spectroscopy (EIS) spectra for four multi-shelled cobalt oxides/sulfides composite hollow microspheres and CS@CoO microspheres.

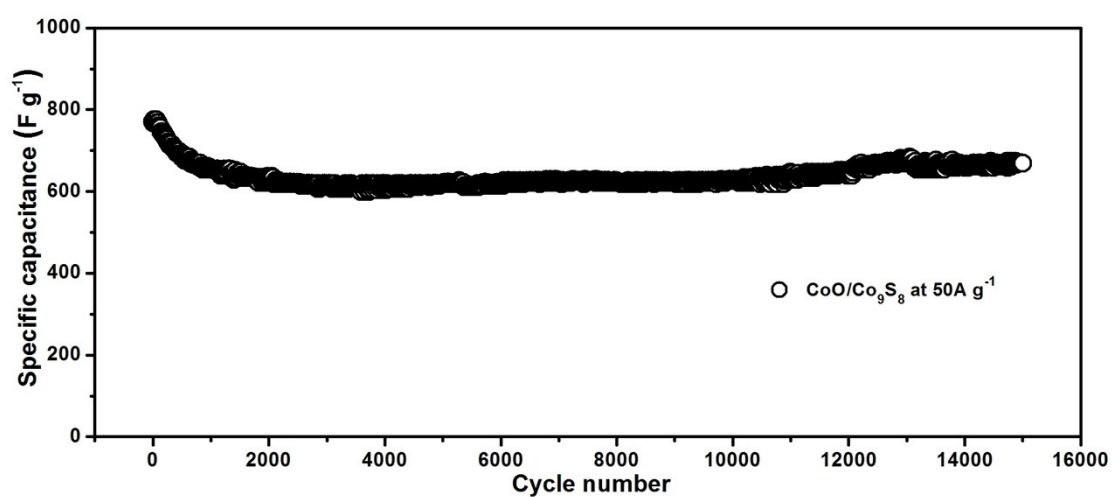

Fig. S17. Long-term cycling performance of multi-shelled CoO/Co<sub>9</sub>S<sub>8</sub> at 50 A g<sup>-1</sup>.

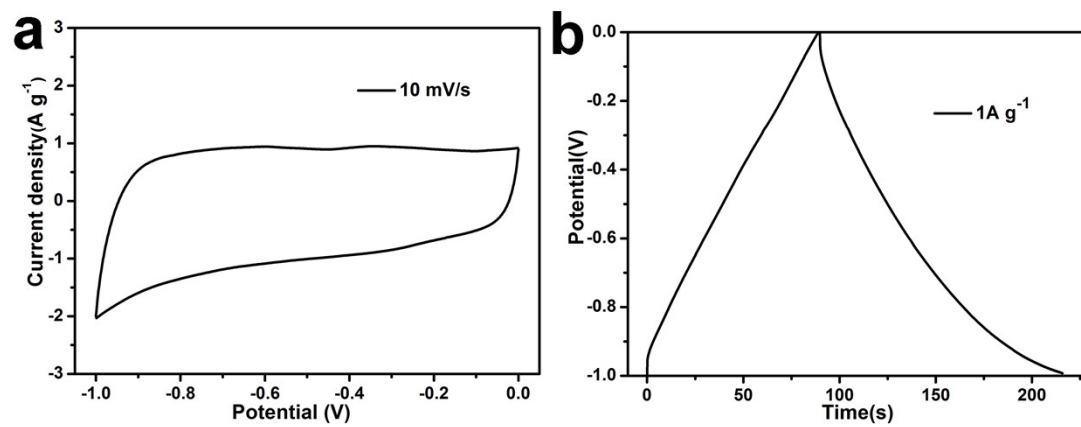

Fig. S18. The CV curve of the AC electrode at 10 mV s<sup>-1</sup> (a) and the galvanostatic charge–discharge curve of the AC electrode at a current of 1 A g<sup>-1</sup> (b).
